# Supplementary material
Source: publisher site journal article supplement (https://www.dovepress.com/article/320021)
Supplement: Supplementary file 1 [file get_supplementary_file.php]

**Safety and Effectiveness of Lurasidone in Patients with Schizophrenia: A 12-Week, Open-Label Extension Study**

**Supplementary**

**Table S1. List of independent ethics committees or institutional review boards**

**Table S2. Subject disposition by Japan (all subjects enrolled)**

**Table S3. Average daily dose and Modal flexible dose during open-label study (safety population)**

**Table S4. Summary of adverse events that occurred in at least 2% of subjects in the overall population by timing of first onset (safety population)**

**Table S5. Summary of treatment-emergent adverse events for Japan (safety population)**

**Table S6. Mean (SD) observed value and change from double-blind and open-label baseline to LOCF endpoint in efficacy measures for Japan (ITT population)**

**Table S7. Mean (SD) observed value and change in PANSS total score from double-blind and open-label baseline to LOCF endpoint by subgroups (ITT population)**

**Table S8. PANSS total score observed value and change from double-blind baseline and open-label baseline to LOCF endpoint, non-responder subpopulation by modal dose (ITT population)**

**Table S9. PANSS total score observed value and change from double-blind baseline and open-label baseline to LOCF endpoint, Japanese non-responder subpopulation by modal dose (ITT population)**

**Table S1-1. List of central independent ethics committees or institutional review boards used by all investigators except those who were required to use their local IRB.**

| Name of ethics committee or institutional review boards |
| --- |
| National Agency for Medicines and Medical Devices, Romania |
| Comisia Naţională de Bioetică a Medicamentului, Romania |
| Bioethics Committee at the Okręgowa Izba Lekarska in Łódź, Poland |
| Ethical Council at the MoH of RF, Russia |
| State Expert Center of the Ministry of Health of Ukraine, Ukraine |

**Table S1-2. List of ethics committees or institutional review boards used by the investigators indicated**

| Name of ethics committee or institutional review boards |
| --- |
| Aichi Medical Association IRB, Japan |
| Jintokukai Sakayori Clinic IRB, Japan |
| Jisenkai Nanko Psychiatric Institute IRB Japan |
| Yoyogi Mental Clinic IRB, Japan |
| Dr.Mano Medical Clinic IRB, Japan |
| Sankeikai Nishigahara HospitaI IRB, Japan |
| Asai Dermatology Clinic IRB, Japan |
| NHO Hizen Psychiatric Center IRB, Japan |
| Osaka Medical Association IRB, Japan |
| Asakayama General Hospital IRB |
| Fujita Health University Hospital IRB, Japan |
| Ekihigashi Hifuka Clinic IRB, Japan |
| Zenshukai Hospital IRB, Japan |
| Hakuseikai Aoki Hospital IRB, Japan |
| Shiosakikai Ino Hospital IRB, Japan |
| Sakurazaka Circulatory Clinic IRB, Japan |
| National Center of Neurology and Psychiatry IRB, Japan |
| Aichi Medical University Hospital IRB, Japan |
| LEC of SPBSHI "Psychiatric Hospital #1 n.a. P.P.Kaschenko", Russia |
| LEC at SPB SR Psychoneurological Inst. n.a.V.M.Bekhterev of MoH, Russia |
| LIEC at SBHI “Chelyabinsk Region Clinical Hospital”, Russia |
| LEC at Msc Scientific Research Inst. of Psychiatry, Russia |
| EC at "Saratov Regional Psychiatry Hospital of St. Sofia", Russia |
| EC of the SBHI “Sverdlovsk Regional Clinical Psychiatric Hospital”, Russia |
| LEC at SHI "Psychiatric hospital #1 n. a. N.A. Alexeev", Russia |
| LEC at JSC “Scientific Centre of Personalized Medicine", Russia |
| EC of BHIOR “Clinical Psychiatric Hospital n.a. N.N. Solodnikov”, Russia |
| LEC Kyiv City Psychoneurological Hospital #2, Ukraine |
| LEC CI Cherkasy Reg.Psych.Hospital, Ukraine |
| LEC Kharkiv Reg.Clin.Psych.Hosp.#3, Ukraine |
| LEC State Institution Institute of Neurology, Psychiatry and Narcology of NAMSU, Ukraine |
| LEC Regional Psychoneurological Hospital #3, Ukraine |
| LEC CI Kherson Regional Psychiatric Hospital, Ukraine |
| LEC Regional Psychoneurological Hospital #1, Ukraine |
| LEC CI " Lviv Regional Clinical Psychiatric Hospital", Ukraine |
| LEC Communal Institution of Kyiv Regional Council: Regional Psychiatric-Narcolo, Ukraine |
| LEC TMA Psychiatry in Kyiv, Ukraine |
| LEC CI Odesa Regional Psychiatric Hospital №2, Ukraine |
| LEC Transcarpathian Regional Narcological Dispensary, Ukraine |

**Table S2. Subject disposition for Japan (all subjects enrolled)**

|  | **Total-**  **lurasidone** | **Lurasidone-lurasidone** | **Placebo-lurasidone** |
| --- | --- | --- | --- |
|  | **n (%)** | **n (%)** | **n (%)** |
| **Subjects receiving open-label study drug** | 71 (100) | 38 (100) | 33 (100) |
| **Subjects completing the open-label study** | 50 (70.4) | 24 (63.2) | 26 (78.8) |
| **Subjects discontinuing the open-label study** | 21 (29.6) | 14 (36.8) | 7 (21.2) |
| **Withdrawal by subject** | 11 (15.5) | 9 (23.7) | 2 (6.1) |
| **Adverse event** | 6 (8.5) | 3 (7.9) | 3 (9.1) |
| **Lack of efficacy** | 2 (2.8) | 1 (2.6) | 1 (3.0) |
| **Other** | 2 (2.8) | 1 (2.6) | 1 (3.0) |
| **Protocol Deviation** | 0 | 0 | 0 |
| **Lost to follow up** | 0 | 0 | 0 |

Total-lurasidone = lurasidone 40 mg/day or placebo during 6-week double-blind study followed by lurasidone (flexibly dosed) during 12-week open-label study.

Lurasidone-lurasidone = lurasidone 40 mg/day during 6-week double-blind study followed by lurasidone (flexibly dosed) during 12-week open-label study.

Placebo-lurasidone = placebo during 6-week double-blind study followed by lurasidone (flexibly dosed) during 12-week open-label study.

**Table S3. Average daily dose and Modal flexible dose during open-label study (Safety Population)**

|  | **Total-**  **lurasidone**  **(N=289)** | **Lurasidone-lurasidone**  **(N=148)** | **Placebo-lurasidone**  **(N=141)** |
| --- | --- | --- | --- |
| **Average daily dose (mg) [mean(SD)]** | 57.1 (16.6) | 57.8 (16.6) | 56.3 (16.7) |
| **Modal flexible dose [n(%)]** |  |  |  |
| **Weeks 1-4** |  |  |  |
| **40 mg/day** | 169 (58.5) | 86 (58.1) | 83 (58.9) |
| **80 mg/day** | 120 (41.5) | 62 (41.9) | 58 (41.1) |
| **Weeks 5-8** |  |  |  |
| **40 mg/day** | 127 (43.9) | 62 (42.9) | 65 (46.1) |
| **80 mg/day** | 132 (45.7) | 72 (48.6) | 60 (42.6) |
| **Weeks 9-12** |  |  |  |
| **40 mg/day** | 119 (41.2) | 57 (38.5) | 62 (44.0) |
| **80 mg/day** | 126 (43.6) | 69 (46.6) | 57 (40.4) |
| **Overall** |  |  |  |
| **40 mg/day** | 153 (52.9) | 74 (50.0) | 79 (56.0) |
| **80 mg/day** | 136 (47.1) | 74 (50.0) | 62 (44.0) |

Percentage were based on the number of subjects in the safety population in that treatment group.

Total-lurasidone = lurasidone 40 mg/day or placebo during 6-week double-blind study followed by lurasidone (flexibly dosed) during 12-week open-label study.

Lurasidone-lurasidone = lurasidone 40 mg/day during 6-week double-blind study followed by lurasidone (flexibly dosed) during 12-week open-label study.

Placebo-lurasidone = placebo during 6-week double-blind study followed by lurasidone (flexibly dosed) during 12-week open-label study.

**Table S4. Summary of adverse events that occurred in at least 2% of subjects in any population by timing of first onset (safety population)**

|  | **Total-lurasidone**  **(N=289)** | | | | **Lurasidone-lurasidone**  **(N=148)** | | | | **Placebo-lurasidone**  **(N=141)** | | |
| --- | --- | --- | --- | --- | --- | --- | --- | --- | --- | --- | --- |
|  | **Time interval (days) of onset of adverse eventsa** | | | | | | | | | | |
|  | **1-29**  **(N=289)** | **30-57**  **(N=261)** | **>=58**  **(N=248)** | **1-29**  **(N=148)** | | **30-57**  **(N=134)** | **>=58**  **(N=128)** | **1-29**  **(N=141)** | | **30-57**  **(N=127)** | **>=58**  **(N=120)** |
|  | **n (%)** | **n (%)** | **n (%)** | **n (%)** | | **n (%)** | **n (%)** | **n (%)** | | **n (%)** | **n (%)** |
| **Any AEs** | 110 (38.1) | 20 (7.7) | 16 (6.5) | 53 (35.8) | | 11 (8.2) | 9 (7.0) | 57 (40.4) | | 9 (7.1) | 7 (5.8) |
| **Nausea** | 11 (3.8) | 0 (0) | 1 (0.4) | 3 (2.0) | | 0 (0) | 1 (0.8) | 8 (5.7) | | 0 (0) | 0 (0) |
| **Constipation** | 5 (1.7) | 4 (1.5) | 2 (0.8) | 2 (1.4) | | 2 (1.5) | 1 (0.8) | 3 (2.1) | | 2 (1.6) | 1 (0.8) |
| **Vomiting** | 4 (1.4) | 0 (0) | 0 (0) | 1 (0.7) | | 0 (0) | 0 (0) | 3 (2.1) | | 0 (0) | 0 (0) |
| **Nasopharyngitis** | 7 (2.4) | 6 (2.3) | 4 (1.6) | 2 (1.4) | | 1 (0.7) | 3 (2.3) | 5 (3.5) | | 5 (3.9) | 1 (0.8) |
| **Blood prolactin increased** | 7 (2.4) | 2 (0.8) | 2 (0.8) | 5 (3.4) | | 1 (0.7) | 2 (1.6) | 2 (1.4) | | 1 (0.8) | 0 (0) |
| **Akathisia** | 14 (4.8) | 2 (0.8) | 3 (1.2) | 4 (2.7) | | 1 (0.7) | 2 (1.6) | 10 (7.1) | | 1 (0.8) | 1 (0.8) |
| **Headache** | 8 (2.8) | 2 (0.8) | 1 (0.4) | 7 (4.7) | | 1 (0.7) | 0 (0) | 1 (0.7) | | 1 (0.8) | 1 (0.8) |
| **Parkinsonism** | 3 (1.0) | 2 (0.8) | 1 (0.4) | 0 (0) | | 1 (0.7) | 1 (0.8) | 3 (2.1) | | 1 (0.8) | 0 (0) |
| **Insomnia** | 10 (3.5) | 2 (0.8) | 1 (0.4) | 4 (2.7) | | 2 (1.5) | 1 (0.8) | 6 (4.3) | | 0 (0) | 0 (0) |
| **Anxiety** | 7 (2.4) | 1 (0.4) | 1 (0.4) | 3 (2.0) | | 1 (0.7) | 1 (0.8) | 4 (2.8) | | 0 (0) | 0 (0) |
| **Schizophrenia** | 7 (2.4) | 2 (0.8) | 7 (2.8) | 4 (2.7) | | 0 (0) | 3 (2.3) | 3 (2.1) | | 2 (1.6) | 4 (3.3) |
| **Agitation** | 5 (1.7) | 0 (0) | 0 (0) | 2 (1.4) | | 0 (0) | 0 (0) | 3 (2.1) | | 0 (0) | 0 (0) |

a Time in days since start of open-label study medication.

Percentage are based on the number of subjects in the safety population in that double-blind treatment group who were still taking open-label study medication at the start of each time interval.

Total-lurasidone = lurasidone 40 mg/day or placebo during 6-week double-blind study followed by lurasidone (flexibly dosed) during 12-week open-label study.

Lurasidone-lurasidone = lurasidone 40 mg/day during 6-week double-blind study followed by lurasidone (flexibly dosed) during 12-week open-label study.

Placebo-lurasidone = placebo during 6-week double-blind study followed by lurasidone (flexibly dosed) during 12-week open-label study.

**Table S5. Summary of treatment-emergent adverse events by Japan (safety population)**

|  | **Total-lurasidone**  **(N=71)** | **Lurasidone-lurasidone (N=38)** | **Placebo-lurasidone**  **(N=33)** |
| --- | --- | --- | --- |
|  | n (%) | n (%) | n (%) |
| Any TEAE | 56 (78.9) | 28 (73.7) | 28 (84.8) |
| Any extrapyramidal TEAE | 10 (14.1) | 2 (5.3) | 8 (24.2) |
| Any hyperglycemia/new onset diabetes mellitus TEAE | 5 (7.0) | 4 (10.5) | 1 (3.0) |
| Any dyslipidaemia TEAE | 0 | 0 | 0 |
| Any weight gain TEAE | 2 (2.8) | 2 (5.3) | 0 |
| Any hypersensitivity TEAE | 10 (14.1) | 5 (13.2) | 5 (15.2) |
| Any serious TEAE | 8 (11.3) | 4 (10.5) | 4 (12.1) |
| Any TEAE leading to discontinuation of study medicationa | 7 (9.9) | 4 (10.5) | 3 (9.1) |
| Any TEAE leading to death | 0 | 0 | 0 |

TEAE = Treatment-emergent adverse event.

Total-lurasidone = lurasidone 40 mg/day or placebo during 6-week double-blind study followed by lurasidone (flexibly dosed) during 12-week open-label study.

Lurasidone-lurasidone = lurasidone 40 mg/day during 6-week double-blind study followed by lurasidone (flexibly dosed) during 12-week open-label study.

Placebo-lurasidone = placebo during 6-week double-blind study followed by lurasidone (flexibly dosed) during 12-week open-label study.

Subjects with two or more events in the same category are counted only once in that category.

Subjects may appear in more than one category.

TEAEs are defined as adverse events that started on or after the date of first dose of open-label study medication.

**Table S6. Mean (SD) observed value and change from double-blind and open-label baseline to LOCF endpoint in efficacy measures for Japan (ITT population)**

|  | **Total-lurasidone**  **(N=70)** | **Lurasidone-lurasidone**  **(N=37)** | **Placebo-lurasidone**  **(N=33)** |
| --- | --- | --- | --- |
| **PANSS total score** |  |  |  |
| **DB baseline** | 100.5 (13.4) | 100.3 (13.1) | 100.8 (13.9) |
| **Change from DB baseline** | -20.3 (20.3) | -25.4 (19.5) | -14.6 (19.9) |
| **OL baseline** | 86.3 (19.7) | 82.8 (18.6) | 90.3 (20.5) |
| **Change from OL baseline** | -6.1 (13.4) | -7.9 (13.9) | -4.1 (12.6) |
| **CGI-S score** |  |  |  |
| **DB baseline** | 4.6 (0.6) | 4.6 (0.6) | 4.7 (0.7) |
| **Change from DB baseline** | -1.0 (1.1) | -1.1 (0.9) | -0.8 (1.2) |
| **OL baseline** | 3.9 (1.1) | 3.8 (1.2) | 3.9 (1.1) |
| **Change from OL baseline** | -0.2 (0.8) | -0.3 (0.9) | -0.1 (0.7) |
| **CDSS score** |  |  |  |
| **DB baseline** | 4.7 (4.2) | 3.9 (3.7) | 5.5 (4.5) |
| **Change from DB baseline** | -1.5 (4.1) | -1.0 (3.9) | -2.1 (4.3) |
| **OL baseline** | 3.4 (3.5) | 2.8 (3.0) | 4.1 (3.9) |
| **Change from OL baseline** | -0.3 (2.8) | 0.1 (3.3) | -0.7 (1.9) |

PANSS = Positive and Negative Syndrome Scale. DB = Double-blind. OL = Open-label. CGI-S = Clinical Global Impressions – Severity scale. CDSS = Calgary Depression Scale for Schizophrenia.

Total-lurasidone = lurasidone 40 mg/day or placebo during 6-week double-blind study followed by lurasidone (flexibly dosed) during 12-week open-label study.

Lurasidone-lurasidone = lurasidone 40 mg/day during 6-week double-blind study followed by lurasidone (flexibly dosed) during 12-week open-label study.

Placebo-lurasidone = placebo during 6-week double-blind study followed by lurasidone (flexibly dosed) during 12-week open-label study.

DB baseline is defined as the last non-missing measurement taken prior to or on the date of first dose of double-blind study medication.

OL baseline is defined as the last non-missing measurement taken during the double-blind study.

**Table S7-1. Mean (SD) observed value and change in PANSS total score from double-blind and open-label baseline to LOCF endpoint by country except for Japan (ITT population)**

|  | **Total-lurasidone**  **(N=287)** | **Lurasidone-lurasidone**  **(N=146)** | **Placebo-lurasidone**  **(N=141)** |
| --- | --- | --- | --- |
| **Poland** | n=3 | n=2 | n=1 |
| **DB baseline** | 106.7 (5.7) | 107.5 (7.8) | 105.0 |
| **Change from DB baseline** | -59.0 (9.5) | -63.5 (7.8) | -50.0 |
| **OL baseline** | 62.3 (12.9) | 55.0 (2.8) | 77.0 |
| **Change from OL baseline** | -14.7 (6.7) | -11.0 (2.8) | -22.0 |
| **Romania** | n=9 | n=5 | n=4 |
| **DB baseline** | 100.2 (7.6) | 100.0 (10.3) | 100.5 (3.7) |
| **Change from DB baseline** | -29.7 (14.2) | -29.2 (10.6) | -30.3 (19.6) |
| **OL baseline** | 75.9 (14.2) | 70.8 (12.5) | 82.3 (15.4) |
| **Change from OL baseline** | -5.3 (17.3) | 0.0 (9.8) | -12.0 (23.7) |
| **Russia** | n=82 | n=40 | n=42 |
| **DB baseline** | 98.1 (9.5) | 100.1 (10.2) | 96.2 (8.4) |
| **Change from DB baseline** | -31.2 (17.3) | -32.9 (17.7) | -29.5 (17.0) |
| **OL baseline** | 76.3 (14.1) | 75.1 (14.5) | 77.5 (13.8) |
| **Change from OL baseline** | -9.4 (14.3) | -8.0 (13.0) | -10.8 (15.5) |
| **Ukraine** | n=123 | n=62 | n=61 |
| **DB baseline** | 103.3 (10.3) | 103.9 (9.0) | 102.6 (11.6) |
| **Change from DB baseline** | -32.6 (14.0) | -32.0 (13.5) | -33.1 (14.6) |
| **OL baseline** | 80.8 (13.3) | 79.5 (13.0) | 82.2 (13.5) |
| **Change from OL baseline** | -10.1 (12.2) | -7.6 (9.9) | -12.7 (13.9) |

PANSS = Positive and Negative Syndrome Scale. DB = Double-blind. OL = Open-label.

Total-lurasidone = lurasidone 40 mg/day or placebo during 6-week double-blind study followed by lurasidone (flexibly dosed) during 12-week open-label study.

Lurasidone-lurasidone = lurasidone 40 mg/day during 6-week double-blind study followed by lurasidone (flexibly dosed) during 12-week open-label study.

Placebo-lurasidone = placebo during 6-week double-blind study followed by lurasidone (flexibly dosed) during 12-week open-label study.

DB baseline is defined as the last non-missing measurement taken prior to or on the date of first dose of double-blind study medication.

OL baseline is defined as the last non-missing measurement taken during the double-blind study.

**Table S7-2. Mean (SD) observed value and change in PANSS total score from double-blind and open-label baseline to LOCF endpoint by race (ITT population)**

|  | **Total-lurasidone**  **(N=287)** | **Lurasidone-lurasidone**  **(N=146)** | **Placebo-lurasidone**  **(N=141)** |
| --- | --- | --- | --- |
| **Asian** | n=71 | n=38 | n=33 |
| **DB baseline** | 100.6 (13.3) | 100.5 (13.0) | 100.8 (13.9) |
| **Change from DB baseline** | -20.6 (20.3) | -25.8 (19.4) | -14.6 (19.9) |
| **OL baseline** | 86.2 (19.6) | 82.7 (18.3) | 90.3 (20.5) |
| **Change from OL baseline** | -6.2 (13.3) | -7.9 (13.8) | -4.1 (12.6) |
| **Native Hawaiian or Other Pacific Islander** | n=1 | n=1 | n=0 |
| **DB baseline** | 81.0 | 81.0 |  |
| **Change from DB baseline** | -8.0 | -8.0 |  |
| **OL baseline** | 85.0 | 85.0 |  |
| **Change from OL baseline** | -12.0 | -12.0 |  |
| **White** | n=215 | n=107 | n=108 |
| **DB baseline** | 101.3 (10.1) | 102.5 (9.4) | 100.1 (10.6) |
| **Change from DB baseline** | -32.4 (15.5) | -33.0 (15.4) | -31.8 (15.7) |
| **OL baseline** | 78.6 (13.9) | 76.9 (14.0) | 80.3 (13.7) |
| **Change from OL baseline** | -9.7 (13.2) | -7.4 (11.2) | -12.0 (14.7) |

PANSS = Positive and Negative Syndrome Scale. DB = Double-blind. OL = Open-label.

Total-lurasidone = lurasidone 40 mg/day or placebo during 6-week double-blind study followed by lurasidone (flexibly dosed) during 12-week open-label study.

Lurasidone-lurasidone = lurasidone 40 mg/day during 6-week double-blind study followed by lurasidone (flexibly dosed) during 12-week open-label study.

Placebo-lurasidone = placebo during 6-week double-blind study followed by lurasidone (flexibly dosed) during 12-week open-label study.

DB baseline is defined as the last non-missing measurement taken prior to or on the date of first dose of double-blind study medication.

OL baseline is defined as the last non-missing measurement taken during the double-blind study.

**Table S8-1. PANSS total score observed value and change from double-blind baseline and open-label baseline to LOCF endpoint, non-responder subpopulation by modal dose (ITT population) for non-responder subpopulation defined by percent change from DB baseline to OL baseline >-20%**

|  | | **Total-lurasidone** | | | **Lurasidone-lurasidone** | | **Placebo-lurasidone** | |
| --- | --- | --- | --- | --- | --- | --- | --- | --- |
| **Modal dose in**  **open-label study** | | **40mg**  **(N=38)** | | **80mg**  **(N=62)** | **40mg**  **(N=11)** | **80mg**  **(N=28)** | **40mg**  **(N=27)** | **80mg**  **(N=34)** |
| **DB baseline** | |  | |  |  |  |  |  |
| **Mean (SD)** | | 98.6 (10.5) | | 100.3 (11.2) | 99.7 (10.7) | 102.7 (11.5) | 98.2 (10.5) | 98.3 (10.7) |
| **OL baseline** | |  | |  |  |  |  |  |
| **Mean (SD)** | | 91.2 (11.2) | | 97.2 (12.1) | 90.2 (11.2) | 96.4 (12.5) | 91.7 (11.3) | 98.0 (11.9) |
| **Change from DB baseline to LOCF endpoint** | | | | |  |  |  |  |
| **Mean (SD)** | -17.3 (17.9) | | -17.0 (15.6) | | -15.7 (18.4) | -17.1 (13.2) | -18.0 (18.1) | -17.0 (17.6) |
| **Change from OL baseline to LOCF endpoint** | | | | |  |  |  |  |
| **Mean (SD)** | -9.9 (17.7) | | | -14.0 (14.8) | -6.2 (16.7) | -10.7 (13.8) | -11.5 (18.1) | -16.7 (15.3) |

LOCF = last observation carried forward. PANSS = Positive and Negative Syndrome Scale. DB = Double-blind. OL = Open-label.

Total-lurasidone = lurasidone 40 mg/day or placebo during 6-week double-blind study followed by lurasidone (flexibly dosed) during 12-week open-label study.

Lurasidone-lurasidone = lurasidone 40 mg/day during 6-week double-blind study followed by lurasidone (flexibly dosed) during 12-week open-label study.

Placebo-lurasidone = placebo during 6-week double-blind study followed by lurasidone (flexibly dosed) during 12-week open-label study.

DB baseline is defined as the last non-missing measurement taken prior to or on the date of first dose of double-blind study medication.

OL baseline is defined as the last non-missing measurement taken during the double-blind study.

LOCF endpoint is defined as the last post-OL baseline assessment up to and including 7 days following the date of last dose of open-label study medication.

**Table S8-2. PANSS total score observed value and change from double-blind baseline and open-label baseline to LOCF endpoint, non-responder subpopulation by modal dose (ITT population) for non-responder subpopulation defined by percent change from DB baseline to OL baseline >-30%**

|  | **Total-lurasidone** | | **Lurasidone-lurasidone** | | **Placebo-lurasidone** | |
| --- | --- | --- | --- | --- | --- | --- |
| **Modal dose in**  **open-label study** | 40mg  (N=51) | 80mg  (N=87) | 40mg  (N=15) | 80mg  (N=46) | 40mg  (N=36) | 80mg  (N=41) |
| **DB baseline** |  |  |  |  |  |  |
| **Mean (SD)** | 98.6 (10.3) | 100.6 (11.0) | 98.6 (10.4) | 102.7 (10.8) | 98.6 (10.4) | 98.2 (10.9) |
| **OL baseline** |  |  |  |  |  |  |
| **Mean (SD)** | 88.7 (11.2) | 93.4 (12.7) | 87.2 (11.4) | 92.0 (12.2) | 89.4 (11.2) | 95.0 (13.2) |
| **Change from DB baseline to LOCF endpoint** | | |  |  |  |  |
| **Mean (SD)** | -19.8 (16.9) | -19.8 (15.3) | -18.0 (18.0) | -21.6 (13.3) | -20.5 (16.7) | -17.7 (17.2) |
| **Change from OL baseline to LOCF endpoint** | | |  |  |  |  |
| **Mean (SD)** | -9.9 (16.5) | -12.6 (14.0) | -6.6 (16.8) | -10.9 (12.3) | -11.3 (16.3) | -14.5 (15.6) |

LOCF = last observation carried forward. PANSS = Positive and Negative Syndrome Scale. DB = Double-blind. OL = Open-label.

Total-lurasidone = lurasidone 40 mg/day or placebo during 6-week double-blind study followed by lurasidone (flexibly dosed) during 12-week open-label study.

Lurasidone-lurasidone = lurasidone 40 mg/day during 6-week double-blind study followed by lurasidone (flexibly dosed) during 12-week open-label study.

Placebo-lurasidone = placebo during 6-week double-blind study followed by lurasidone (flexibly dosed) during 12-week open-label study.

DB baseline is defined as the last non-missing measurement taken prior to or on the date of first dose of double-blind study medication.

OL baseline is defined as the last non-missing measurement taken during the double-blind study.

LOCF endpoint is defined as the last post-OL baseline assessment up to and including 7 days following the date of last dose of open-label study medication.

**Table S8-3. PANSS total score observed value and change from double-blind baseline and open-label baseline to LOCF endpoint, non-responder subpopulation by modal dose (ITT population) for non-responder subpopulation defined by OL baseline >=80**

|  | **Total-lurasidone** | | **Lurasidone-lurasidone** | | **Placebo-lurasidone** | |
| --- | --- | --- | --- | --- | --- | --- |
| **Modal dose in**  **open-label study** | 40mg  (N=56) | 80mg  (N=91) | 40mg  (N=19) | 80mg  (N=49) | 40mg  (N=37) | 80mg  (N=42) |
| **DB baseline** |  |  |  |  |  |  |
| **Mean (SD)** | 103.6 (11.1) | 104.1 (11.5) | 104.1 (10.5) | 105.7 (9.9) | 103.4 (11.6) | 102.2 (13.1) |
| **OL baseline** |  |  |  |  |  |  |
| **Mean (SD)** | 89.4 (9.6) | 94.2 (11.5) | 87.3 (9.2) | 92.3 (11.0) | 90.4 (9.8) | 96.4 (11.8) |
| **Change from DB baseline to LOCF endpoint** | | |  |  |  |  |
| **Mean (SD)** | -24.4 (19.1) | -22.7 (17.1) | -22.9 (19.0) | -24.2 (15.7) | -25.2 (19.4) | -20.9 (18.7) |
| **Change from OL baseline to LOCF endpoint** | | |  |  |  |  |
| **Mean (SD)** | -10.2 (16.3) | -12.8 (14.0) | -6.2 (15.6) | -10.9 (13.1) | -12.2 (16.4) | -15.1 (14.7) |

LOCF = last observation carried forward. PANSS = Positive and Negative Syndrome Scale. DB = Double-blind. OL = Open-label.

Total-lurasidone = lurasidone 40 mg/day or placebo during 6-week double-blind study followed by lurasidone (flexibly dosed) during 12-week open-label study.

Lurasidone-lurasidone = lurasidone 40 mg/day during 6-week double-blind study followed by lurasidone (flexibly dosed) during 12-week open-label study.

Placebo-lurasidone = placebo during 6-week double-blind study followed by lurasidone (flexibly dosed) during 12-week open-label study.

DB baseline is defined as the last non-missing measurement taken prior to or on the date of first dose of double-blind study medication.

OL baseline is defined as the last non-missing measurement taken during the double-blind study.

LOCF endpoint is defined as the last post-OL baseline assessment up to and including 7 days following the date of last dose of open-label study medication.

**Table S9-1. PANSS total score observed value and change from double-blind baseline and open-label baseline to LOCF endpoint, Japanese non-responder subpopulation by modal dose (ITT population) for non-responder subpopulation defined by percent change from DB baseline to OL baseline >-20%**

|  | **Total-lurasidone** | | **Lurasidone-lurasidone** | | **Placebo-lurasidone** | |
| --- | --- | --- | --- | --- | --- | --- |
| **Modal dose in**  **open-label study** | 40mg  (N=11) | 80mg  (N=29) | 40mg  (N=2) | 80mg  (N=17) | 40mg  (N=9) | 80mg  (N=12) |
| **DB baseline** |  |  |  |  |  |  |
| **Mean (SD)** | 99.9 (12.5) | 103.2 (12.1) | 97.5 (0.7) | 103.2 (12.5) | 100.4 (13.9) | 103.3 (11.9) |
| **OL baseline** |  |  |  |  |  |  |
| **Mean (SD)** | 95.5 (14.1) | 100.3 (13.4) | 92.0 (1.4) | 96.8 (13.0) | 96.2 (15.7) | 105.3 (12.6) |
| **Change from DB baseline to LOCF endpoint** | | |  |  |  |  |
| **Mean (SD)** | -7.2 (7.4) | -12.0 (17.8) | -7.0 (7.1) | -16.5 (15.7) | -7.2 (7.9) | -5.5 (19.3) |
| **Change from OL baseline to LOCF endpoint** | | |  |  |  |  |
| **Mean (SD)** | -2.7 (5.8) | -9.1 (16.0) | -1.5 (6.4) | -10.2 (16.9) | -3.0 (6.1) | -7.5 (15.3) |

LOCF = last observation carried forward. PANSS = Positive and Negative Syndrome Scale. DB = Double-blind. OL = Open-label.

Total-lurasidone = lurasidone 40 mg/day or placebo during 6-week double-blind study followed by lurasidone (flexibly dosed) during 12-week open-label study.

Lurasidone-lurasidone = lurasidone 40 mg/day during 6-week double-blind study followed by lurasidone (flexibly dosed) during 12-week open-label study.

Placebo-lurasidone = placebo during 6-week double-blind study followed by lurasidone (flexibly dosed) during 12-week open-label study.

DB baseline is defined as the last non-missing measurement taken prior to or on the date of first dose of double-blind study medication.

OL baseline is defined as the last non-missing measurement taken during the double-blind study.

LOCF endpoint is defined as the last post-OL baseline assessment up to and including 7 days following the date of last dose of open-label study medication.

**Table S9-2. PANSS total score observed value and change from double-blind baseline and open-label baseline to LOCF endpoint, Japanese non-responder subpopulation by modal dose (ITT population) for non-responder subpopulation defined by percent change from DB baseline to OL baseline >-30%**

|  | **Total-lurasidone** | | **Lurasidone-lurasidone** | | **Placebo-lurasidone** | |
| --- | --- | --- | --- | --- | --- | --- |
| **Modal dose in**  **open-label study** | 40mg  (N=13) | 80mg  (N=31) | 40mg  (N=3) | 80mg  (N=18) | 40mg  (N=10) | 80mg  (N=13) |
| **DB baseline** |  |  |  |  |  |  |
| **Mean (SD)** | 98.7 (12.0) | 102.3 (12.3) | 94.0 (6.1) | 102.5 (12.5) | 100.1 (13.2) | 101.9 (12.5) |
| **OL baseline** |  |  |  |  |  |  |
| **Mean (SD)** | 92.6 (14.9) | 98.6 (14.5) | 85.0 (12.2) | 95.6 (13.8) | 94.9 (15.4) | 102.9 (14.9) |
| **Change from DB baseline to LOCF endpoint** | | |  |  |  |  |
| **Mean (SD)** | -9.8 (9.3 ) | -12.0 (17.5) | -13.3 (12.1) | -17.0 (15.4) | -8.7 (8.8) | -5.1 (18.6) |
| **Change from OL baseline to LOCF endpoint** | | |  |  |  |  |
| **Mean (SD)** | -3.7 (5.8) | -8.4 (15.9) | -4.3 (6.7) | -10.1 (16.4) | -3.5 (6.0) | -6.1 (15.5) |

LOCF = last observation carried forward. PANSS=Positive and Negative Syndrome Scale. DB = Double-blind. OL = Open-label.

Total-lurasidone = lurasidone 40 mg/day or placebo during 6-week double-blind study followed by lurasidone (flexibly dosed) during 12-week open-label study.

Lurasidone-lurasidone = lurasidone 40 mg/day during 6-week double-blind study followed by lurasidone (flexibly dosed) during 12-week open-label study.

Placebo-lurasidone = placebo during 6-week double-blind study followed by lurasidone (flexibly dosed) during 12-week open-label study.

DB baseline is defined as the last non-missing measurement taken prior to or on the date of first dose of double-blind study medication.

OL baseline is defined as the last non-missing measurement taken during the double-blind study.

LOCF endpoint is defined as the last post-OL baseline assessment up to and including 7 days following the date of last dose of open-label study medication.

**Table S9-3. PANSS total score observed value and change from double-blind baseline and open-label baseline to LOCF endpoint, Japanese non-responder subpopulation by modal dose (ITT population) for non-responder subpopulation defined by OL baseline >=80**

|  | **Total-lurasidone** | | **Lurasidone-lurasidone** | | **Placebo-lurasidone** | |
| --- | --- | --- | --- | --- | --- | --- |
| **Modal dose in**  **open-label study** | 40mg  (N=10) | 80mg  (N=31) | 40mg  (N=2) | 80mg  (N=18) | 40mg  (N=8) | 80mg  (N=13) |
| **DB baseline** |  |  |  |  |  |  |
| **Mean (SD)** | 103.2 (9.5) | 105.5 (13.3) | 97.5 (0.7) | 104.9 (11.6) | 104.6 (10.2) | 106.4 (15.9) |
| **OL baseline** |  |  |  |  |  |  |
| **Mean (SD)** | 98.5 (11.2) | 100.4 (12.8) | 92.0 (1.4) | 96.7 (12.2) | 100.1 (12.0) | 105.5 (12.1) |
| **Change from DB baseline to LOCF endpoint** | | |  |  |  |  |
| **Mean (SD)** | -9.0 (9.0) | -15.6 (21.2) | -7.0 (7.1) | -20.3 (19.3) | -9.5 (9.8) | -9.2 (22.9) |
| **Change from OL baseline to LOCF endpoint** | | |  |  |  |  |
| **Mean (SD)** | -4.3 (5.6) | -10.5 (16.4) | -1.5 (6.4) | -12.1 (17.7) | -5.0 (5.7) | -8.4 (15.0) |

LOCF = last observation carried forward. PANSS = Positive and Negative Syndrome Scale. DB = Double-blind. OL = Open-label.

Total-lurasidone = lurasidone 40 mg/day or placebo during 6-week double-blind study followed by lurasidone (flexibly dosed) during 12-week open-label study.

Lurasidone-lurasidone = lurasidone 40 mg/day during 6-week double-blind study followed by lurasidone (flexibly dosed) during 12-week open-label study.

Placebo-lurasidone = placebo during 6-week double-blind study followed by lurasidone (flexibly dosed) during 12-week open-label study.

DB baseline is defined as the last non-missing measurement taken prior to or on the date of first dose of double-blind study medication.

OL baseline is defined as the last non-missing measurement taken during the double-blind study.

LOCF endpoint is defined as the last post-OL baseline assessment up to and including 7 days following the date of last dose of open-label study medication.
